# Supplementary figures and images for: Risk factors for development and progression of diabetic retinopathy in Dutch patients with type 1 diabetes mellitus
Source: PubMed Central journal article supplement — Acta Ophthalmol. 2018 Sep 6;96(5):459–64. doi: 10.1111/aos.13815 (PMC6174939; doi:10.1111/aos.13815), 2018-09-06

**A**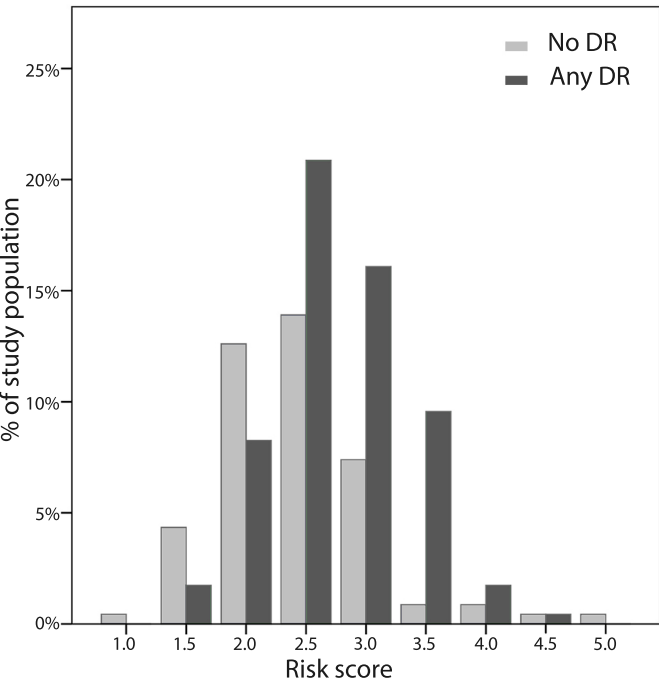**B**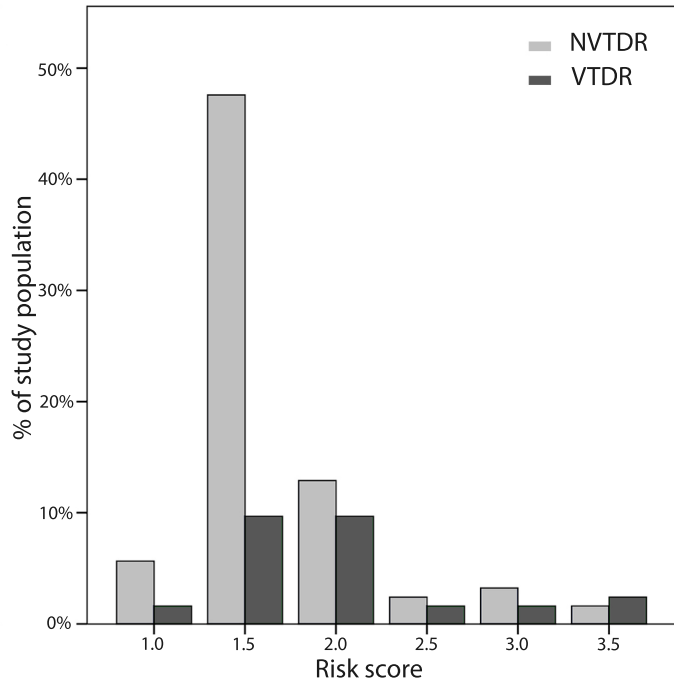

Supplement: AOS-96-459-s001.pdf [file AOS-96-459-s001.pdf]
